# Supplementary material for: Blastocyst complementation using Prdm14-deficient rats enables efficient germline transmission and generation of functional mouse spermatids in rats
Source: PubMed Central journal article supplement (PMC7910474; doi:10.1038/s41467-021-21557-x), 2021-02-26

Figure 1k

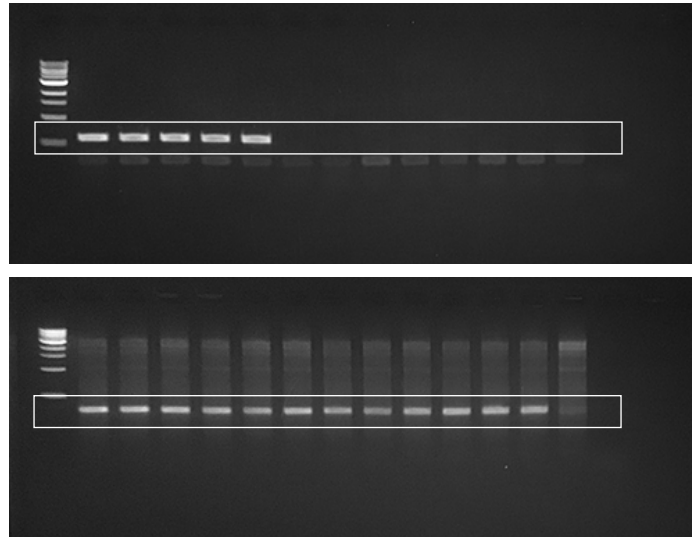

Supplementary Figure 1a

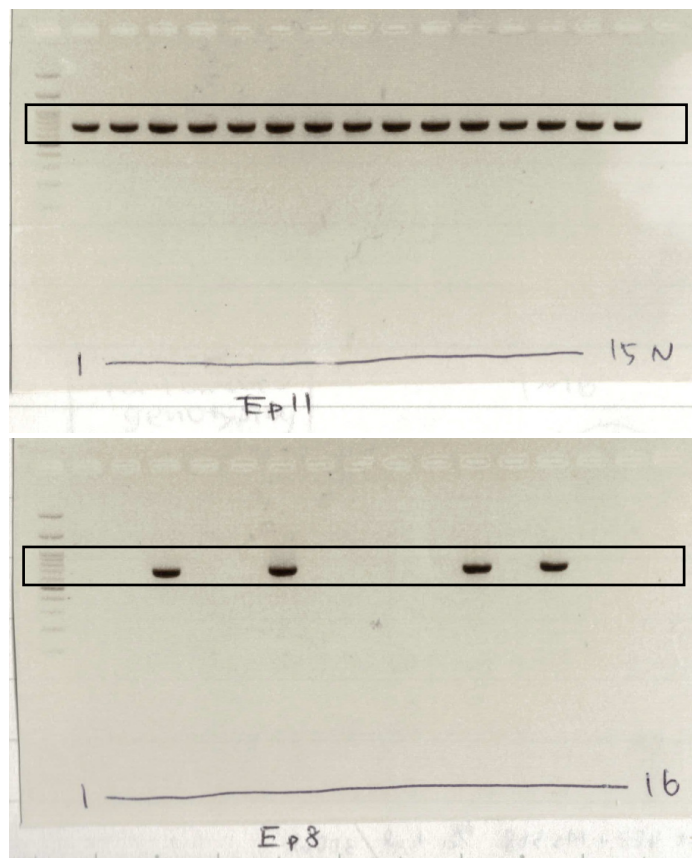

Supplementary Figure 3h

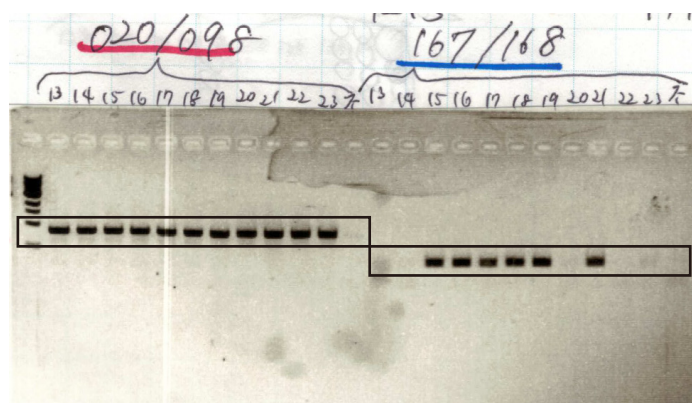

Supplement: 41467_2021_21557_MOESM4_ESM.pdf [file 41467_2021_21557_MOESM4_ESM.pdf]
